# Supplementary material for: Clearance of systemic hematologic tumors by venetoclax (Abt-199) and navitoclax
Source: PubMed Central journal article supplement — Pharmacol Res Perspect. 2015 Sep 1;3(5):e00178. doi: 10.1002/prp2.178 (PMC4618648; doi:10.1002/prp2.178), 2015-09-01
Supplement: prp20003-e00178-sd1.pdf [file prp20003-e00178-sd1.pdf]

**navitoclax (ABT-263)**

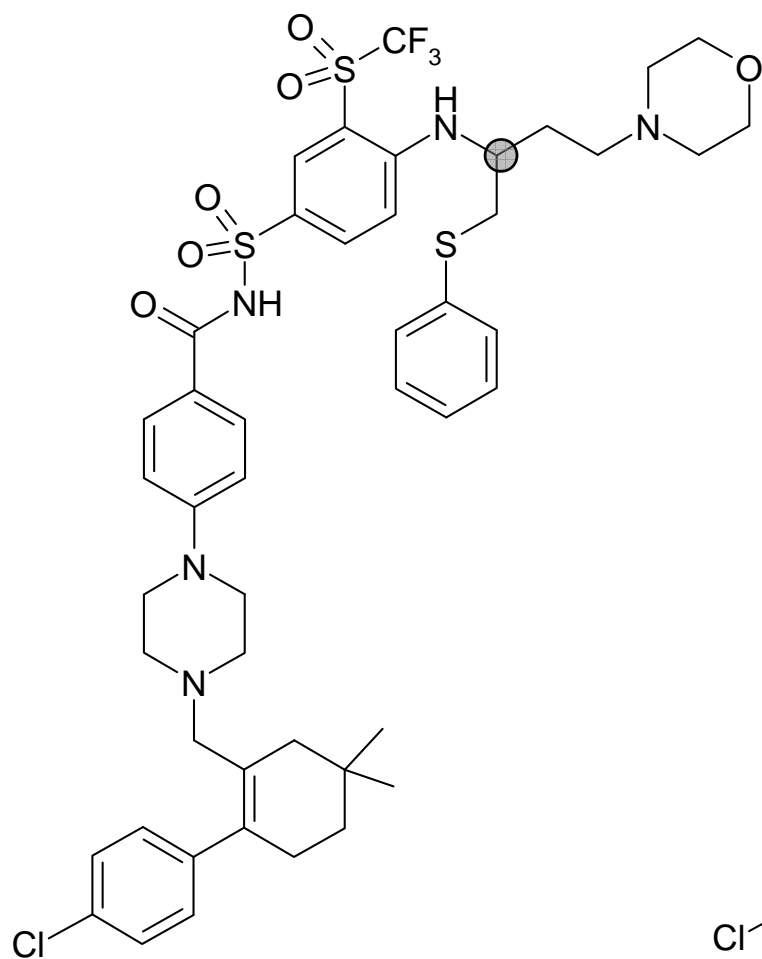

**venetoclax (ABT-199)**

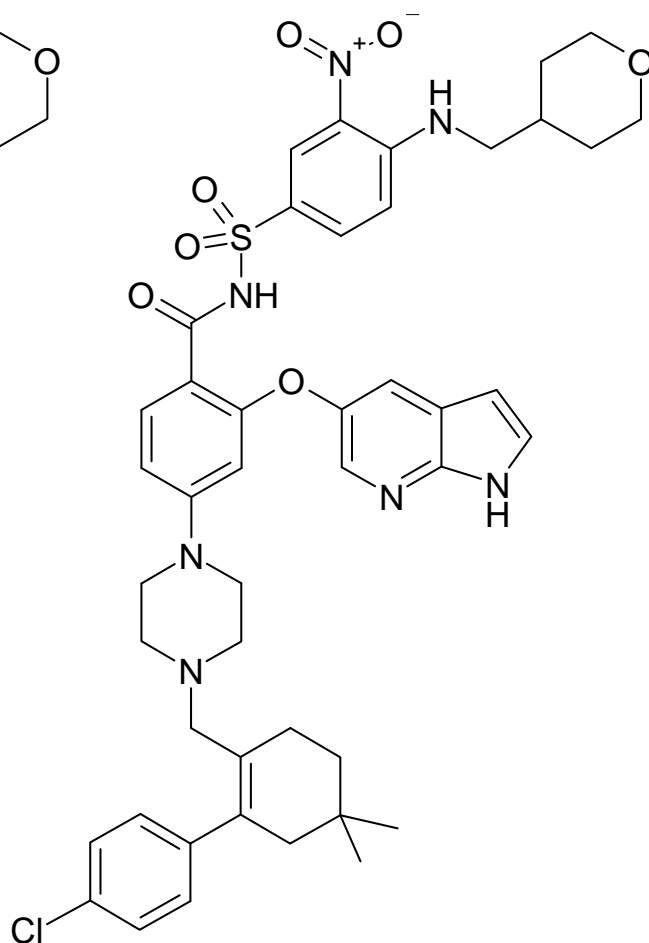

**Figure S1**

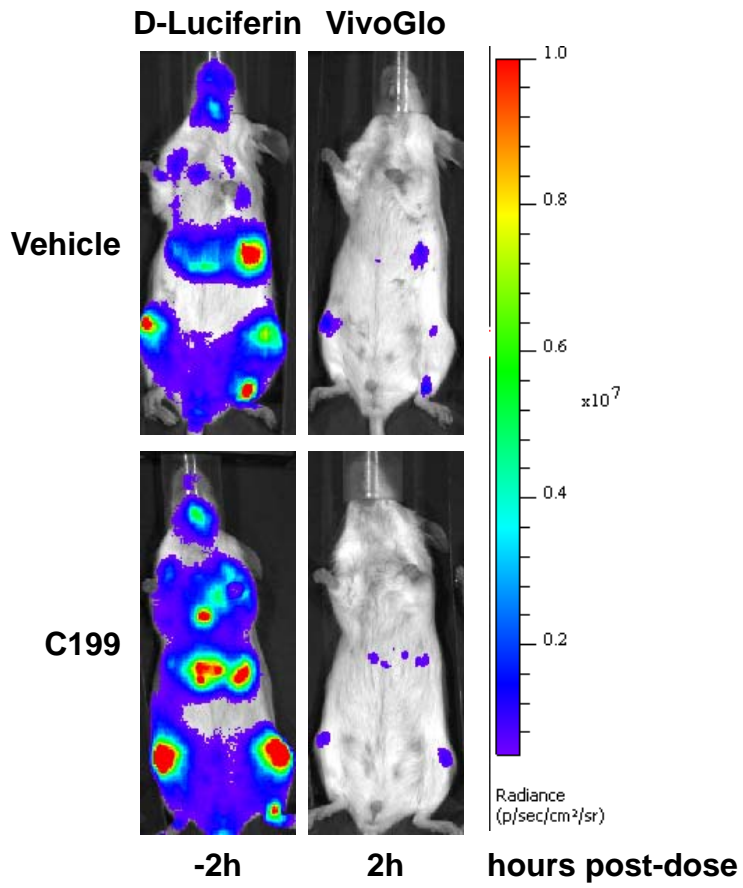

Figure S2

BR group

Days post-size match

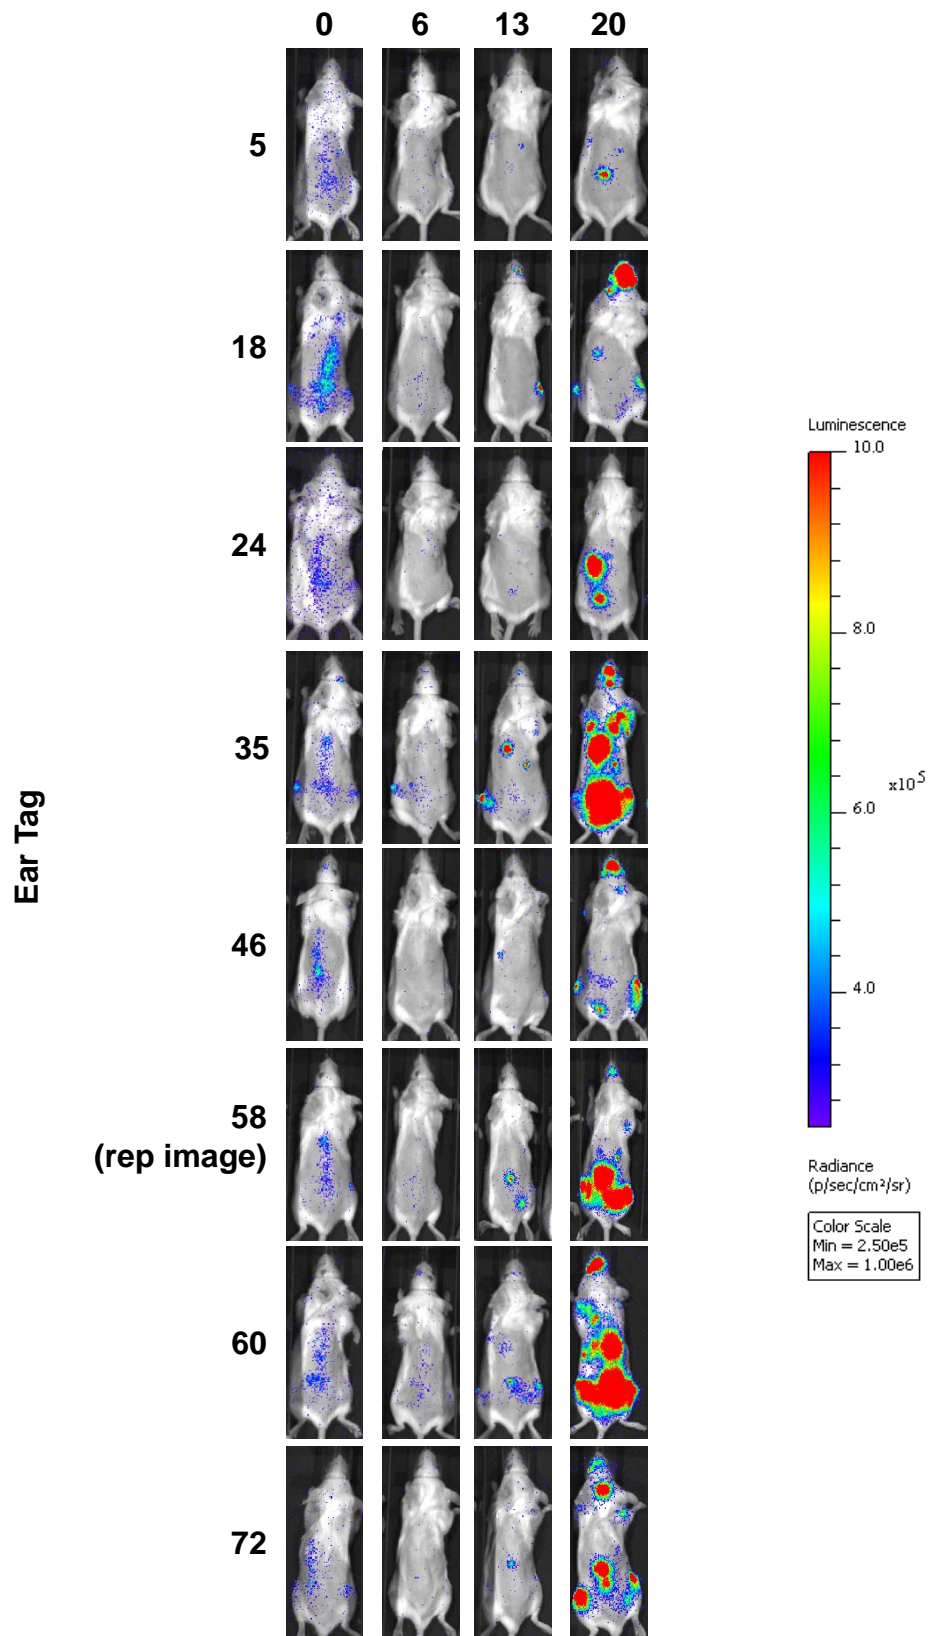

Fig S3

navitoclax + BR group

Days post-size match

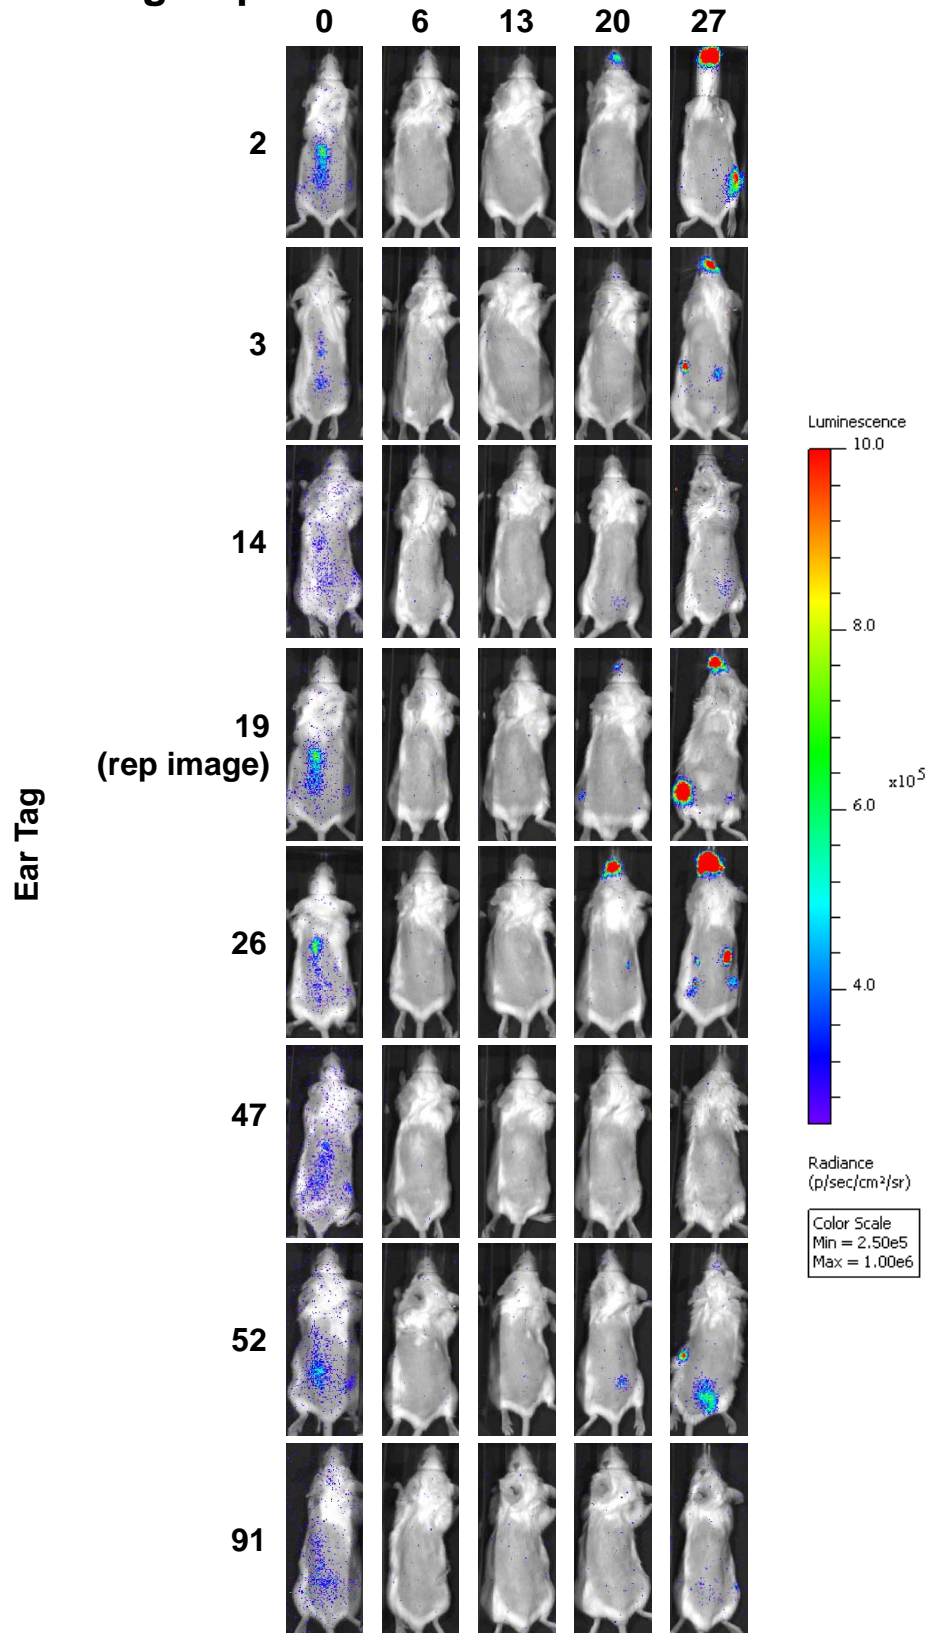

Fig S3 cont'd

venetoclax + BR group

Days post-size match

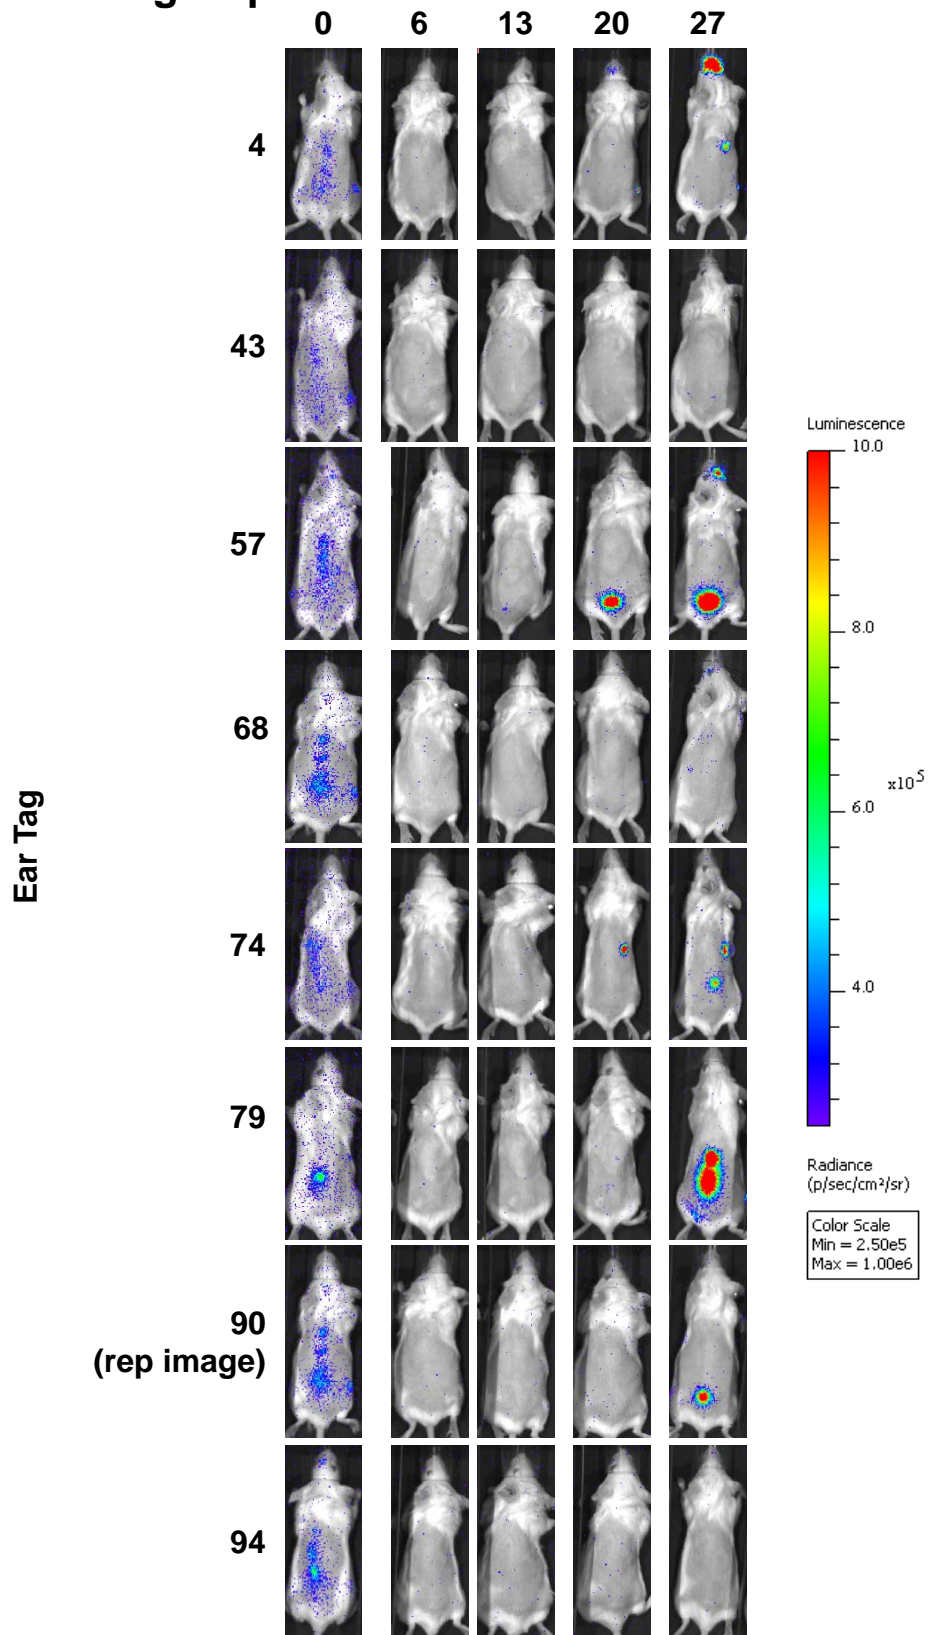

Fig S3 cont'd
